# Supplementary material for: The Effect of Titanium Tetra-Butoxide Catalyst on the Olefin Polymerization
Source: MDPI journal article supplement (doi:10.3390/polym13132109), 2021-06-26
Supplement: s1 [file s1]

# The Effect of Titanium Tetra-Butoxide Catalyst on the Olefin Polymerization

Mohammed S. Alsuhybani and Eid M. Alosime \*

King Abdulaziz City for Science and Technology (KACST), P.O. Box 6086,  
Riyadh 11442, Saudi Arabia; sohybani@kacst.edu.sa (M.S.A.);  
alosimi@kacst.edu.sa (E.M.A.)

\* Correspondence: alosimi@kacst.edu.sa

SEM – EDS analysis has been performed to study the catalyst particles and investigating the existence of element in ethylene homopolymerization and ethylene copolymerization.

Figures S1–S5 show the results of SEM-EDS analysis which have performed for ethylene polymerization tested at five different molar ratios of cocatalyst TEA to Ti [Al]/[Ti]: 309, 618, 773, 927, and 1236 mmol respectively.

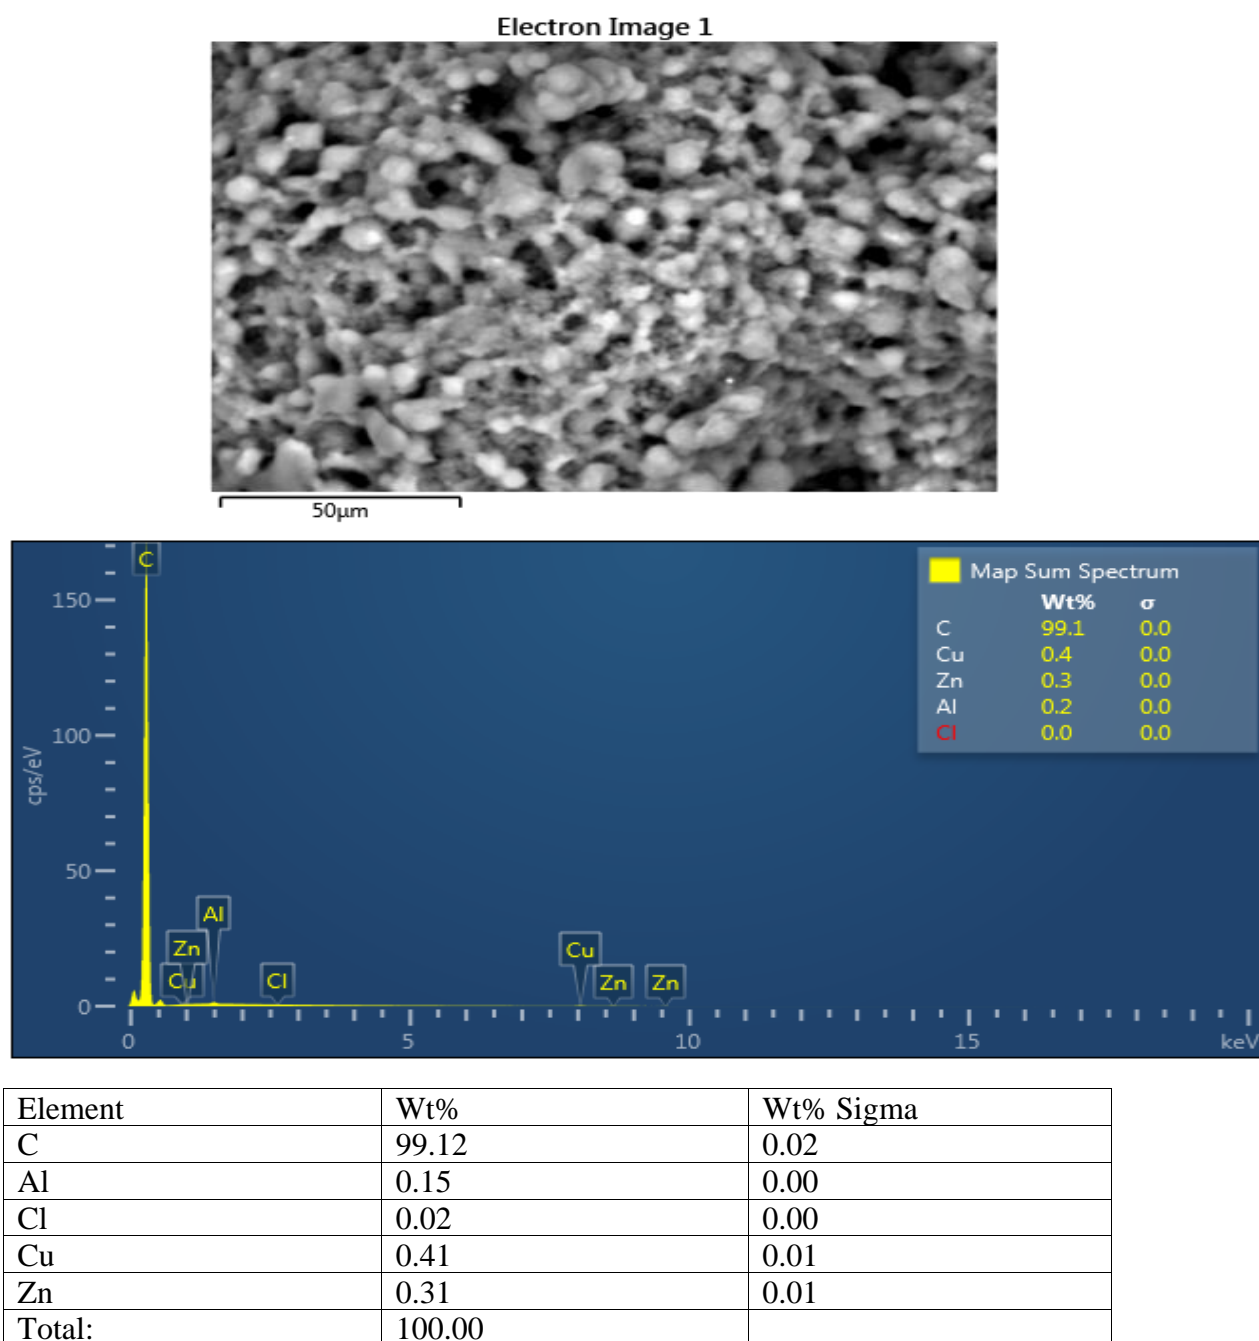

**Figure S1.** SEM-EDS images of the ethylene polymerization carried out using [Al]/[Ti] molar ratio at 309.

Electron Image 1

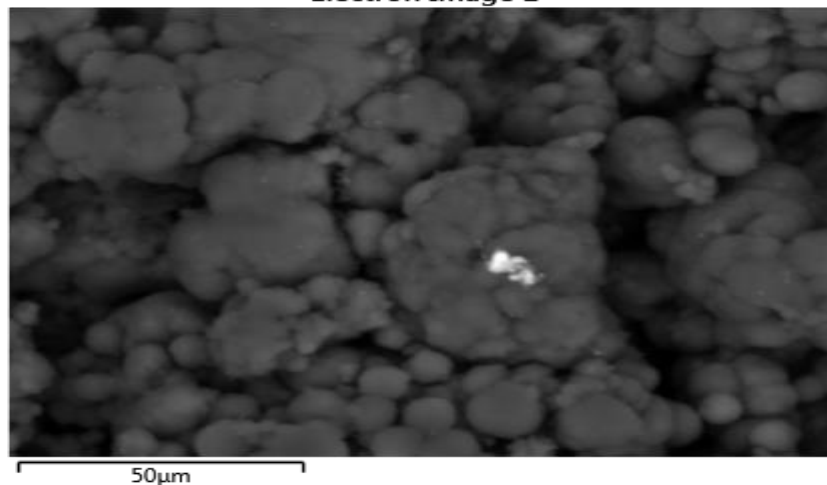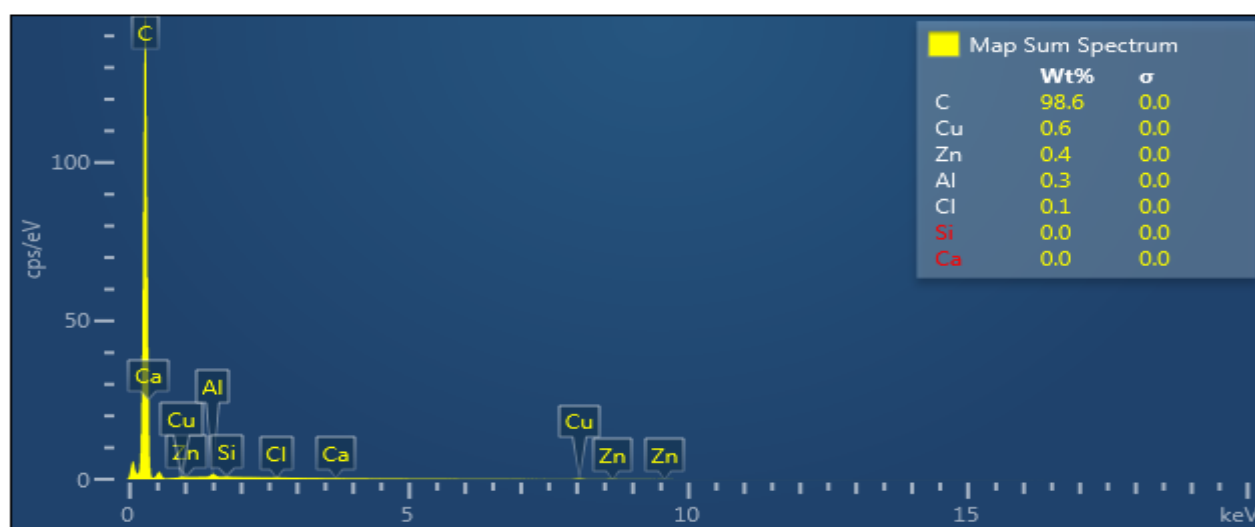

| Element | Wt%    | Wt% Sigma |
|---------|--------|-----------|
| C       | 98.62  | 0.02      |
| Al      | 0.28   | 0.00      |
| Si      | 0.03   | 0.00      |
| Cl      | 0.05   | 0.00      |
| Ca      | 0.02   | 0.00      |
| Cu      | 0.57   | 0.01      |
| Zn      | 0.43   | 0.02      |
| Total:  | 100.00 |           |

**Figure S2.** SEM-EDS images of the ethylene polymerization carried out using [Al]/[Ti] molar ratio at 618 mmol.

Electron Image 1

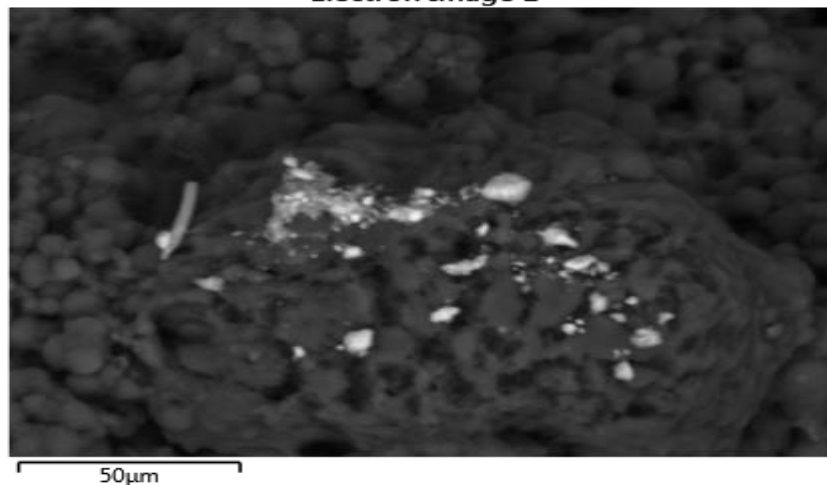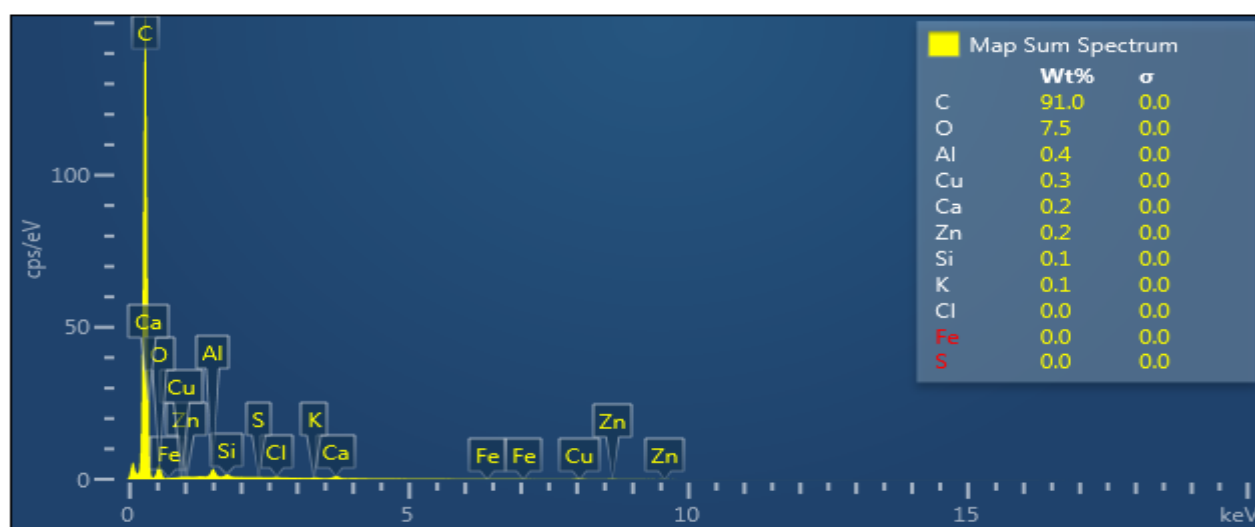

| Element | Wt%    | Wt% Sigma |
|---------|--------|-----------|
| C       | 91.00  | 0.03      |
| O       | 7.53   | 0.03      |
| Al      | 0.44   | 0.00      |
| Si      | 0.12   | 0.00      |
| S       | 0.01   | 0.00      |
| Cl      | 0.05   | 0.00      |
| K       | 0.06   | 0.00      |
| Ca      | 0.23   | 0.00      |
| Fe      | 0.04   | 0.00      |
| Cu      | 0.32   | 0.01      |
| Zn      | 0.20   | 0.01      |
| Total:  | 100.00 |           |

**Figure S3.** SEM-EDS images of the ethylene polymerization carried out using [Al]/[Ti] molar ratio at 773 mmol.

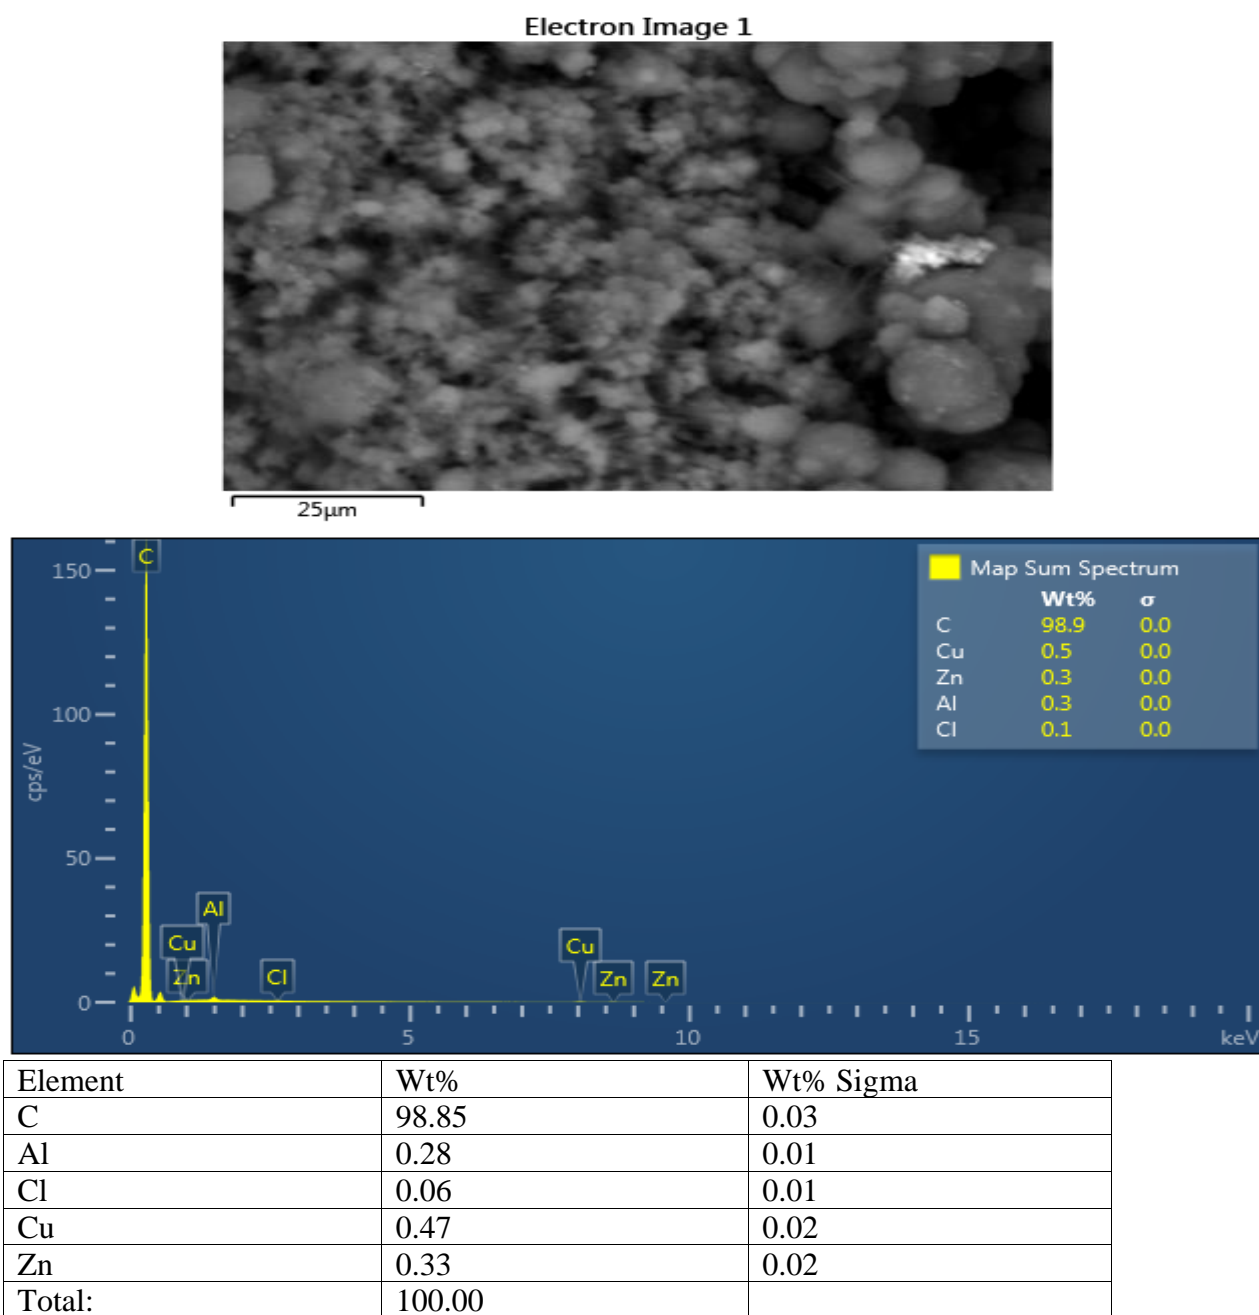

**Figure S4.** SEM-EDS images of the ethylene polymerization carried out using [Al]/[Ti] molar ratio at 927 mmol.

Electron Image 1

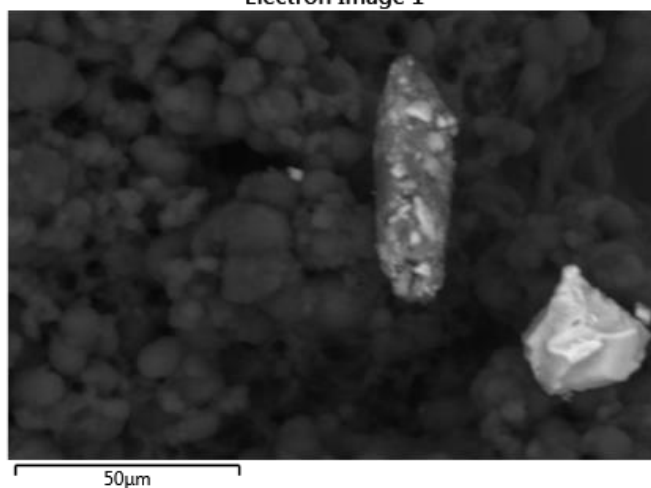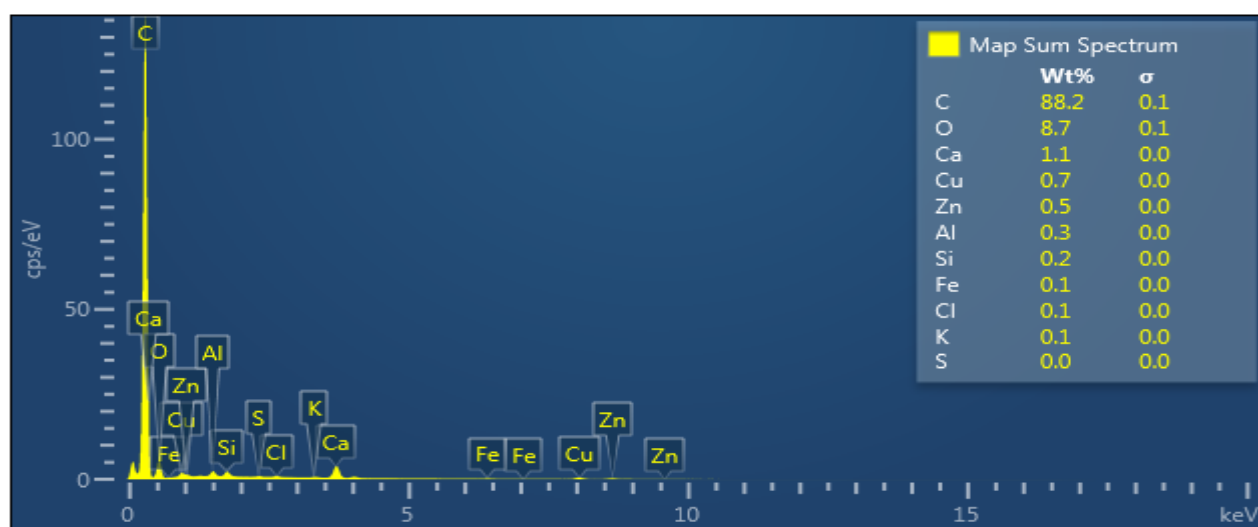

| Element | Wt%    | Wt% Sigma |
|---------|--------|-----------|
| C       | 88.16  | 0.06      |
| O       | 8.70   | 0.05      |
| Al      | 0.26   | 0.00      |
| Si      | 0.23   | 0.00      |
| S       | 0.05   | 0.00      |
| Cl      | 0.08   | 0.00      |
| K       | 0.07   | 0.00      |
| Ca      | 1.12   | 0.01      |
| Fe      | 0.08   | 0.01      |
| Cu      | 0.74   | 0.01      |
| Zn      | 0.51   | 0.01      |
| Total:  | 100.00 |           |

**Figure S5.** SEM-EDS images of the ethylene polymerization carried out using [Al]/[Ti] molar ratio at 1236 mmol.

Figures S6–S8 show the results of SEM-EDS analysis, which have performed for the ethylene/1-octene copolymerization with various 1-octene concentration 32 mmol, 64 mmol and 127 mmol respectively.

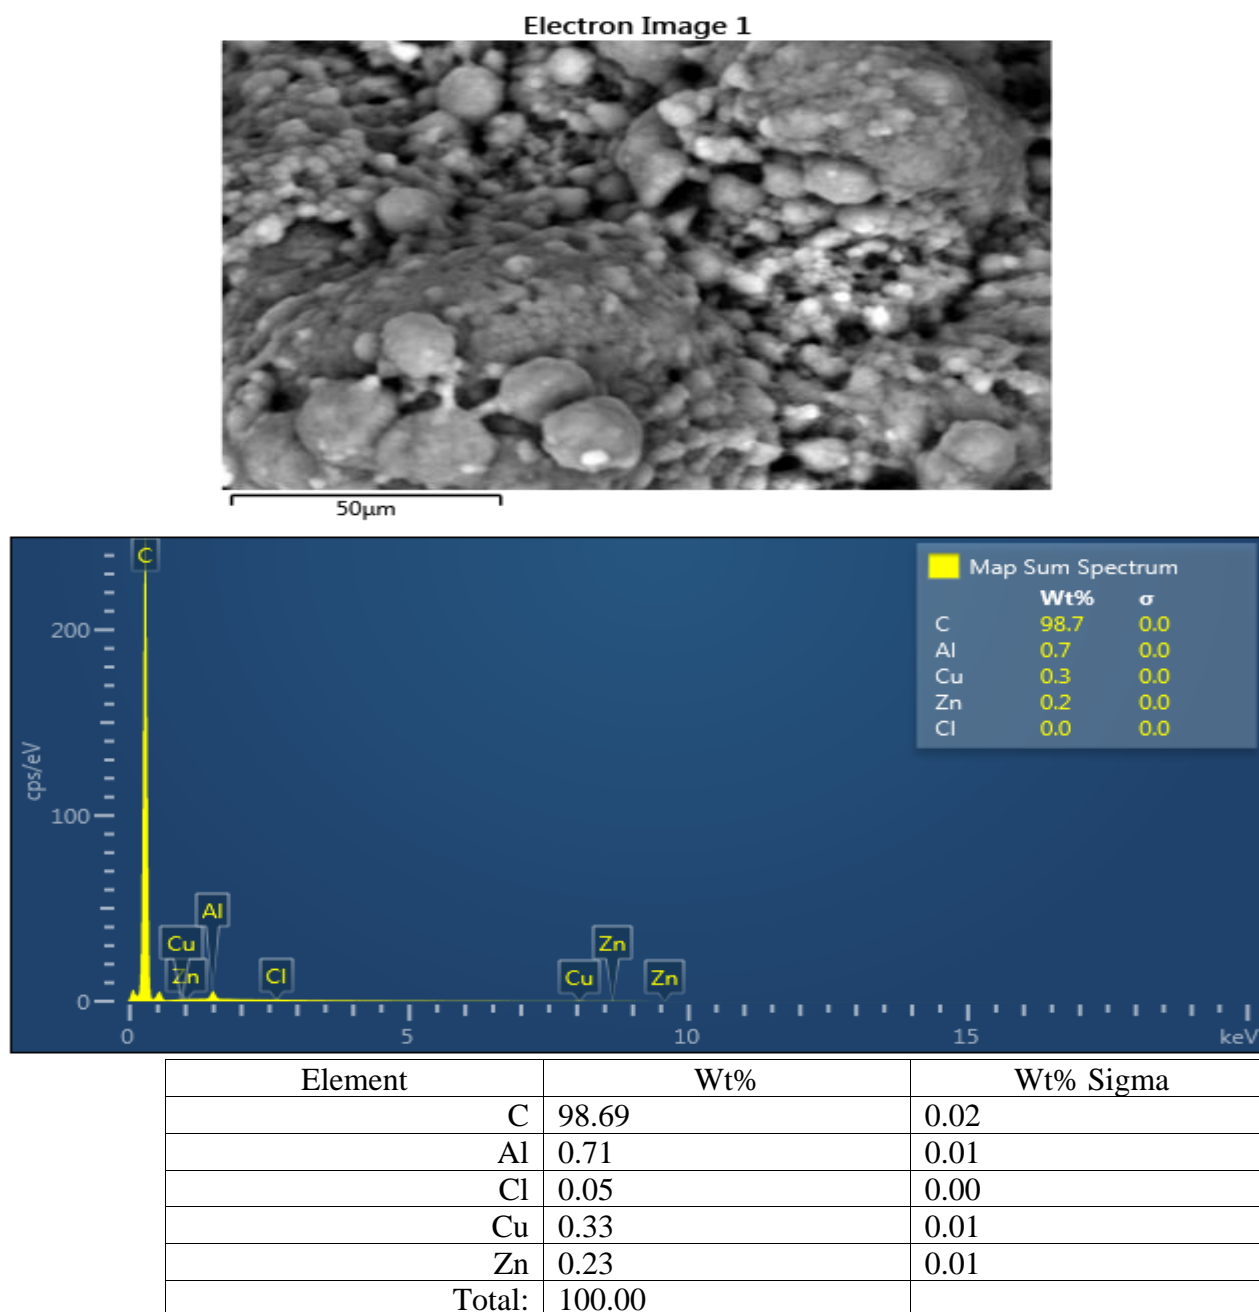

**Figure S6.** SEM-Eds images of the ethylene/1-octene copolymerization carried out using 1-octene concentration at 32 mmol.

Electron Image 1

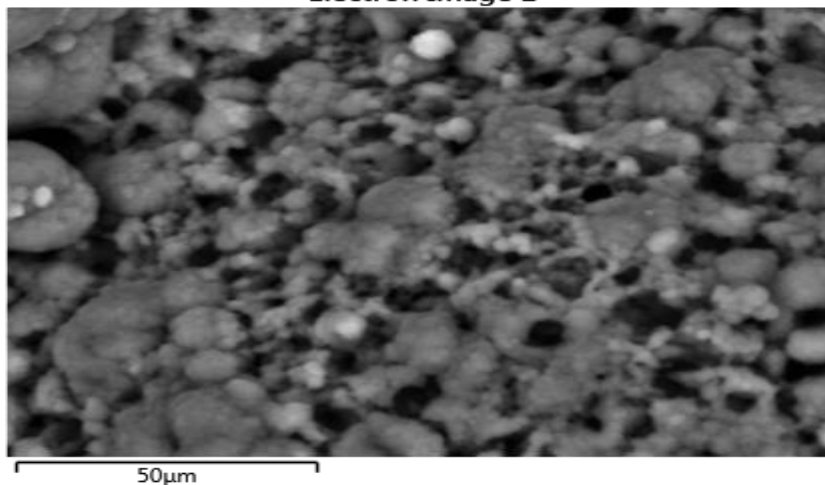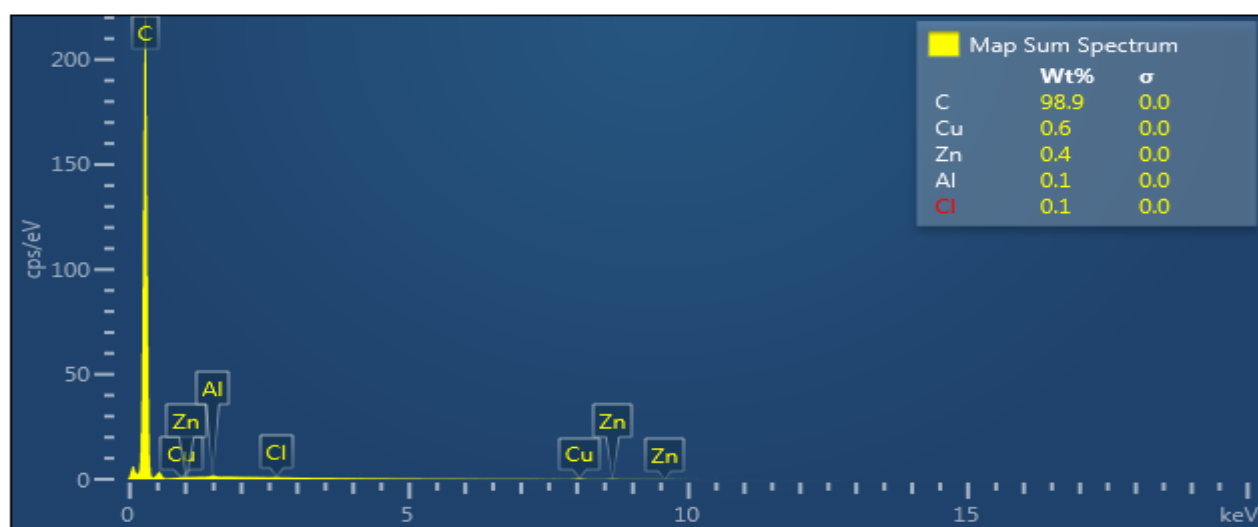

| Element | Wt%    | Wt% Sigma |
|---------|--------|-----------|
| C       | 98.85  | 0.04      |
| Al      | 0.11   | 0.01      |
| Cl      | 0.06   | 0.01      |
| Cu      | 0.59   | 0.02      |
| Zn      | 0.38   | 0.03      |
| Total:  | 100.00 |           |

**Figure S7.** SEM-Eds images of the ethylene/1-octene copolymerization carried out using 1-octene concentration at 64 mmol.



Electron Image 1

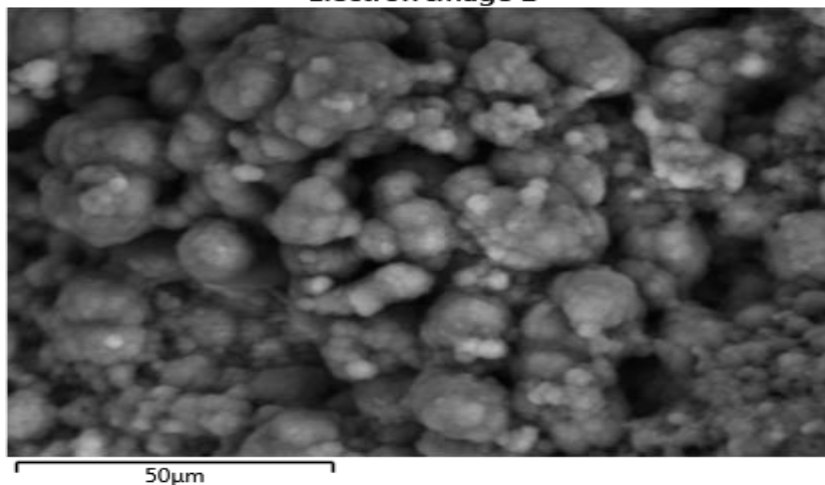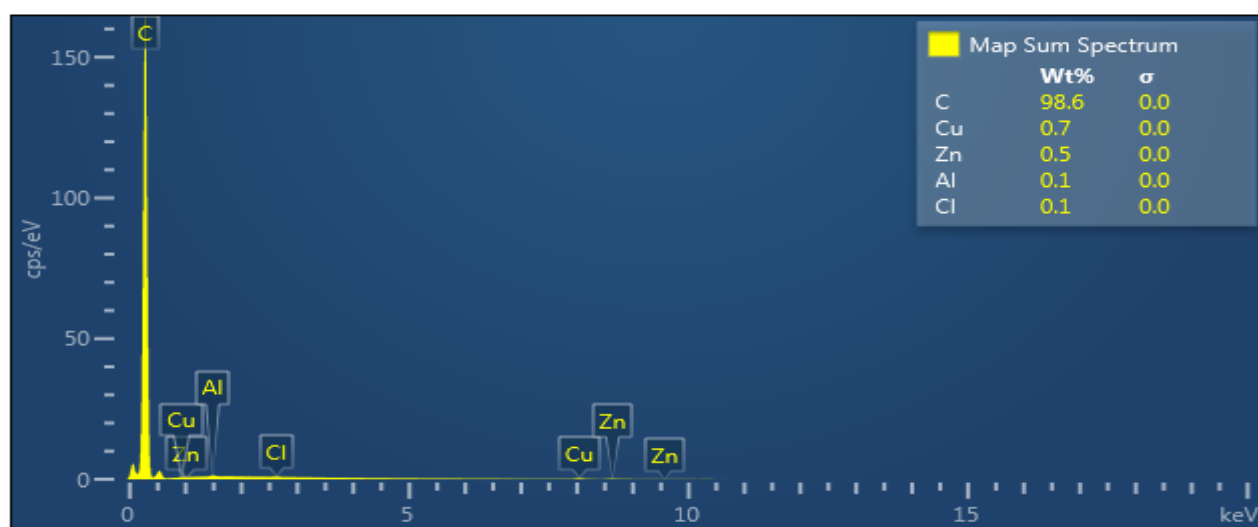

| Element | Wt%    | Wt% Sigma |
|---------|--------|-----------|
| C       | 98.55  | 0.03      |
| Al      | 0.11   | 0.01      |
| Cl      | 0.06   | 0.01      |
| Cu      | 0.74   | 0.02      |
| Zn      | 0.53   | 0.02      |
| Total:  | 100.00 |           |

**Figure S8.** SEM-Eds images of the ethylene/1-octene copolymerization carried out using 1-octene concentration at 127 mmol.

High temperature  $^{13}\text{C}$  NMR has been performed to analyze the copolymers obtained from the prepared catalyst.

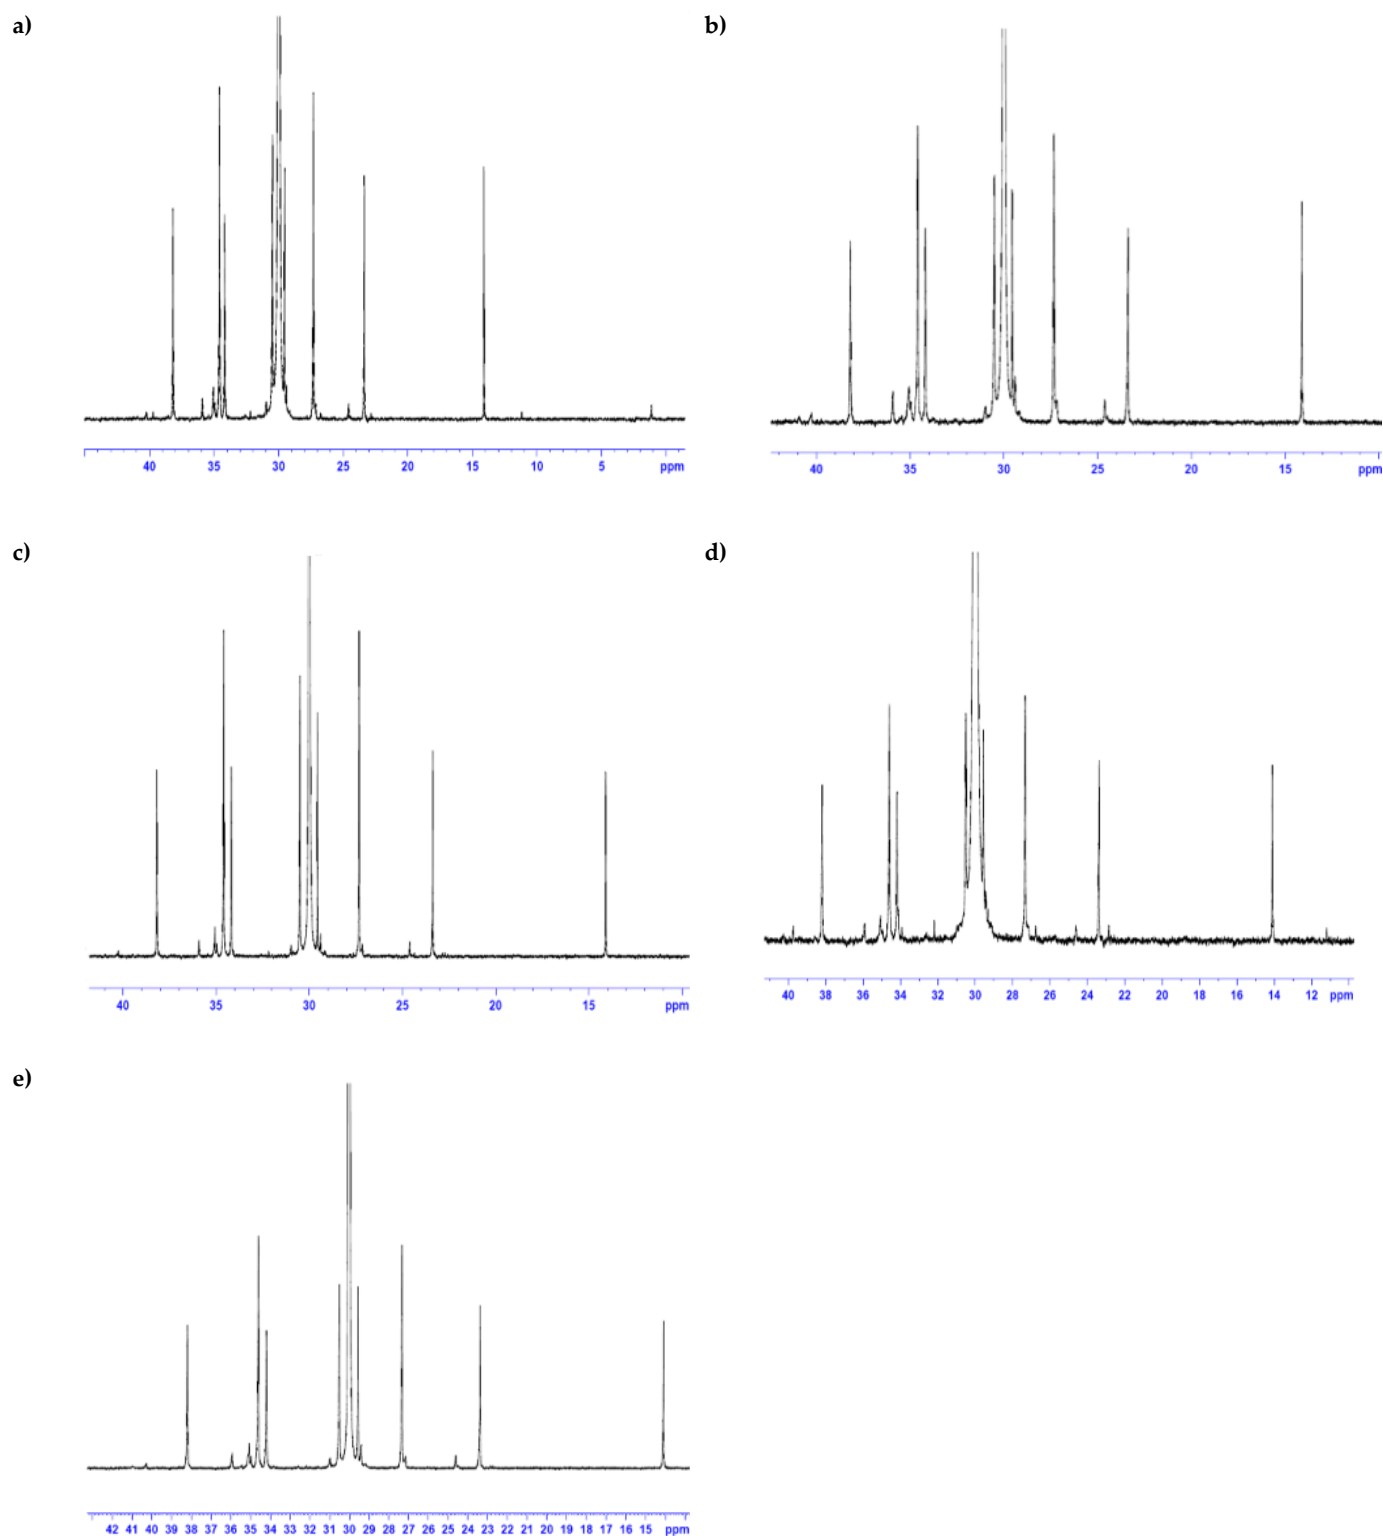

**Figure S9.** High Temperature  $^{13}\text{C}$  NMR spectra of the copolymers: a) 32 mmol of 1-octene, b) 64 mmol of 1-octene, c) 127 mmol of 1-octene, d) 40 mmol of 1-hexene, and e) 68 mmol of 1-hexene.
